# Supplementary material for: Glycolate oxidase gene family in Nicotiana benthamiana: genome-wide identification and functional analyses in disease resistance
Source: PubMed Central journal article supplement (PMC5988680; doi:10.1038/s41598-018-27000-4), 2018-06-05
Supplement: 41598_2018_27000_MOESM1_ESM.pdf [file 41598_2018_27000_MOESM1_ESM.pdf]

## Supplementary Materials

### **Glycolate oxidase gene family in *Nicotiana benthamiana*: genome-wide identification and functional analyses in disease resistance**

You-Ping Xu<sup>1,2</sup>, Juan Yang<sup>1</sup> & Xin-Zhong Cai<sup>1,\*</sup>

<sup>1</sup> State key laboratory of Rice Biology, Institute of Biotechnology, College of Agriculture and Biotechnology, Zhejiang University, 866 Yu Hang Tang Road, Hangzhou 310058, China

<sup>2</sup> Centre of Analysis and Measurement, Zhejiang University, 866 Yu Hang Tang Road, Hangzhou 310058, China

## Supplementary Table

Supplementary Table S1 Primers used in this study

| Gene                | Primer name | Sequence (5'→3')         | Product (bp) |
|---------------------|-------------|--------------------------|--------------|
| Primers for qRT-PCR |             |                          |              |
| Nb18srDNA           | Nb18srDNA-F | AGGATTGACAGACTGAGAGC     | 210          |
|                     | Nb18srDNA-R | CACAGACCTGTTATTGCCTC     |              |
| TRV1 Rep            | TRV1 Rep-F  | ATCTCAAGTTGATTTGAGGTT    | 461          |
|                     | TRV1 Rep-R  | TGATCTCTTTGCTTACATCGT    |              |
| TRV2 2b             | TRV2 2b-F   | ATGCACGAATTACTTAGGAAG    | 303          |
|                     | TRV2 2b-R   | GGTAACCTTACTCACAGAAT     |              |
| NbHAOX8             | NbHAOX8-F   | TAGTTTCGTCGTGGAAGCGG     | 212          |
|                     | NbHAOX8-R   | TAAAGGGGAAGCAGAAATCA     |              |
| NbGOX1              | NbGOX1-F    | GCAGCCAGCAAGAGAAGTCA     | 132          |
|                     | NbGOX1-R    | TCAATGTAACGGCAAAAAGAG    |              |
| NbGOX4              | NbGOX4-F    | GTGAAGGGAAACTGTGAAAC     | 140          |
|                     | NbGOX4-R    | GGTGGGGTGTGGATGAAGA      |              |
| NbPR1               | NbPR1-F     | GTGCCCAAATTCTCAACA       | 196          |
|                     | NbPR1-R     | AAATCGCCACTTCCCTCAG      |              |
| NbNPR1              | NbNPR1-F    | CGCCGGCGGAGATTACTTCACT   | 163          |
|                     | NbNPR1-R    | GGACTCCTCGCCGACAAAATG    |              |
| NbRbohD             | NbRbohD-F   | AACCGGCGCCAAGTCCAATGATG  | 236          |
|                     | NbRbohD-R   | TTAAAGAAGCCAAACGCCTGAGC  |              |
| NbRbohF             | NbRbohF-F   | CAGATTCTTCCGGTCAGGCTTGTA | 249          |
|                     | NbRbohF-R   | ACCCGCTTGAGTTCTTGAGTCCAG |              |
| NbPDF1.2            | NbPDF1.2-F  | ACAGAGATGGGACCAACGACA    | 160          |
|                     | NbPDF1.2-R  | AGAAACAACGGCGGCGGAAT     |              |
| Nbwrky45            | Nbwrky45-F  | GAGAGAATCTGCAACAGTGG     | 181          |
|                     | Nbwrky45-R  | GTATGTGGTCTGGTAAATGA     |              |
| Nbwrky62            | Nbwrky62-F  | GGATGATACTCCACCTACTA     | 195          |

|                                    |            |                             |     |
|------------------------------------|------------|-----------------------------|-----|
|                                    | Nbwrky62-R | CCCTCTCCACATGCTTCTTC        |     |
| Primers for making VIGS constructs |            |                             |     |
| NbHAOX8                            | NbHAOX8-F  | ggatccGCATAGCTCCA ACTCTACAA | 237 |
|                                    | NbHAOX8-R  | gaattcATATCAGATTGCTCGTGACT  |     |
| NbGOX1                             | NbGOX1-F   | ggatccATATCGTTGCCTCCTATGAG  | 243 |
|                                    | NbGOX1-R   | gaattcAAGAACTTCACCTTACACCTG |     |
| NbGOX4                             | NbGOX4-F   | ggatccAACCATCCATTTGCCCTTCTA | 334 |
|                                    | NbGOX4-R   | gaattcGCAATCGCCTCATACTCCAT  |     |

---

## Supplementary Figures

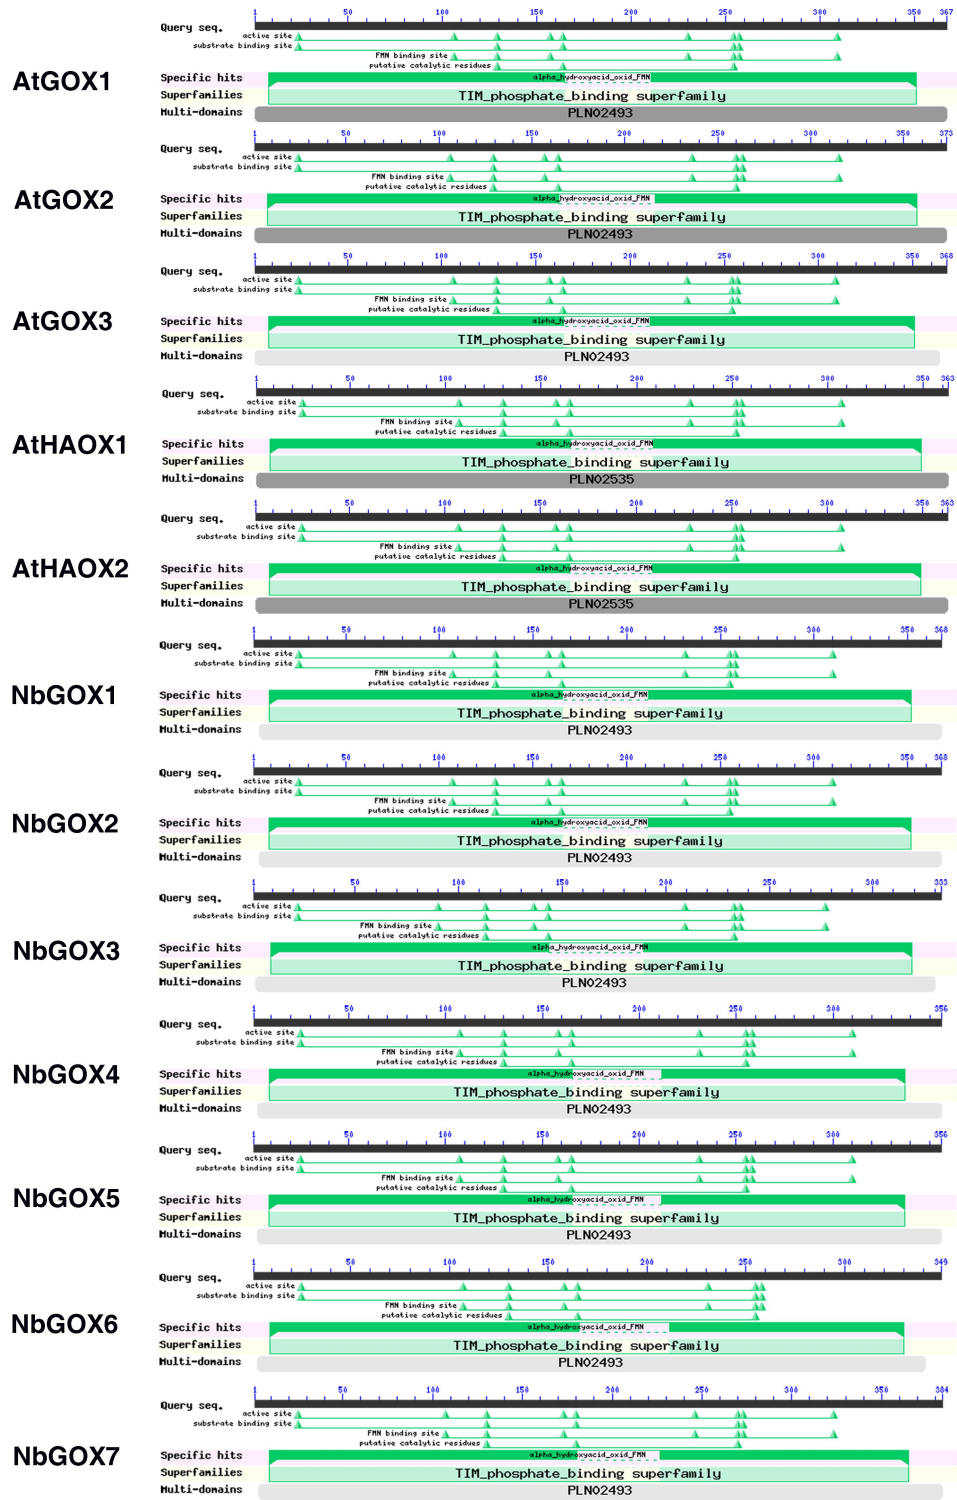

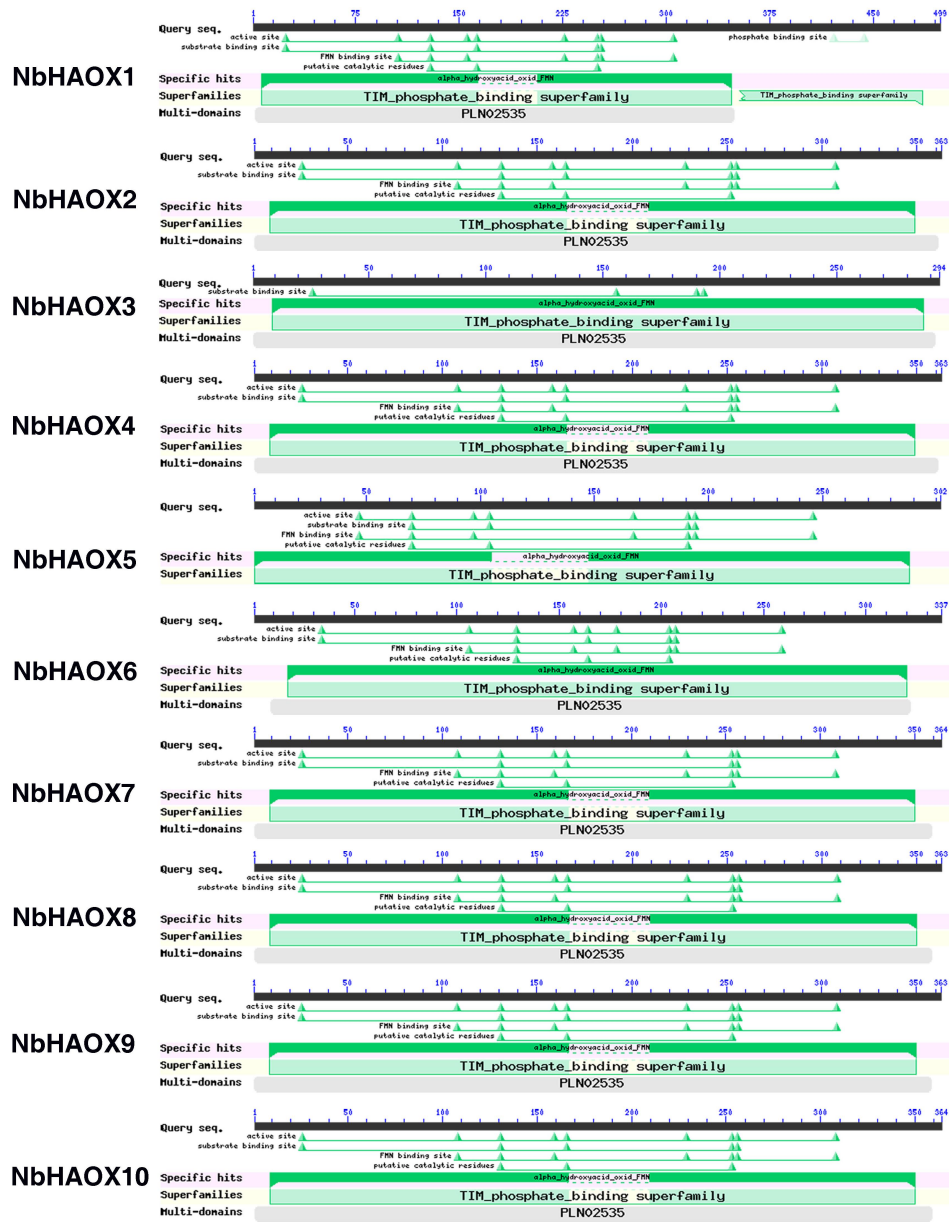

Supplementary Figure S1. Domain composition of GOX family proteins in *Nicotiana benthamiana* and *Arabidopsis thaliana*. Domain composition analysis was performed online using NCBI-CDD program.

|            |    | Percent Identity |      |      |      |      |      |      |      |      |      |      |      |      |      |      |      |      |      |      |      |      |      |    |          |
|------------|----|------------------|------|------|------|------|------|------|------|------|------|------|------|------|------|------|------|------|------|------|------|------|------|----|----------|
| Divergence |    | 1                | 2    | 3    | 4    | 5    | 6    | 7    | 8    | 9    | 10   | 11   | 12   | 13   | 14   | 15   | 16   | 17   | 18   | 19   | 20   | 21   | 22   |    |          |
|            | 1  | █                | 95.1 | 86.4 | 61.6 | 59.7 | 85.6 | 85.3 | 75.0 | 87.8 | 87.5 | 90.1 | 88.8 | 54.7 | 54.8 | 51.4 | 55.1 | 56.0 | 59.7 | 59.4 | 60.1 | 59.8 | 59.9 | 1  | AtGOX1   |
|            | 2  | 5.1              | █    | 84.0 | 61.2 | 59.8 | 83.1 | 82.8 | 72.6 | 86.1 | 85.8 | 88.7 | 87.9 | 54.7 | 54.8 | 51.7 | 55.1 | 56.3 | 59.5 | 59.9 | 60.1 | 59.3 | 59.4 | 2  | AtGOX2   |
|            | 3  | 15.1             | 18.1 | █    | 61.7 | 60.6 | 85.0 | 84.7 | 72.6 | 81.9 | 81.6 | 86.1 | 83.9 | 53.1 | 52.6 | 49.7 | 52.9 | 53.3 | 57.5 | 57.7 | 58.7 | 59.0 | 58.6 | 3  | AtGOX3   |
|            | 4  | 53.4             | 54.2 | 53.1 | █    | 91.8 | 61.7 | 61.4 | 55.8 | 59.8 | 59.5 | 61.9 | 59.8 | 66.4 | 66.6 | 60.4 | 67.4 | 67.5 | 69.7 | 70.8 | 71.3 | 73.2 | 73.0 | 4  | AtHAOX1  |
|            | 5  | 57.2             | 57.0 | 55.3 | 8.7  | █    | 59.5 | 59.2 | 54.5 | 58.6 | 58.3 | 60.7 | 58.7 | 66.9 | 67.1 | 61.1 | 67.7 | 66.6 | 69.4 | 70.5 | 69.6 | 71.8 | 71.6 | 5  | AtHAOX2  |
|            | 6  | 16.1             | 19.2 | 16.8 | 53.1 | 57.6 | █    | 99.5 | 78.7 | 84.1 | 83.9 | 85.8 | 83.6 | 53.9 | 53.6 | 51.2 | 54.1 | 55.0 | 59.2 | 58.4 | 59.9 | 59.7 | 59.5 | 6  | NbGOX1   |
|            | 7  | 16.4             | 19.5 | 17.1 | 53.7 | 58.2 | 0.5  | █    | 78.4 | 83.9 | 83.6 | 85.5 | 83.3 | 53.6 | 53.3 | 50.9 | 53.9 | 54.6 | 58.8 | 58.1 | 59.7 | 59.4 | 59.2 | 7  | NbGOX2   |
|            | 8  | 30.4             | 34.1 | 34.1 | 65.7 | 68.5 | 25.1 | 25.6 | █    | 73.3 | 73.0 | 75.2 | 73.1 | 49.8 | 49.5 | 45.4 | 50.2 | 50.7 | 54.6 | 54.8 | 55.0 | 54.4 | 55.2 | 8  | NbGOX3   |
|            | 9  | 13.4             | 15.4 | 20.8 | 57.0 | 59.4 | 17.9 | 18.2 | 33.1 | █    | 99.7 | 92.0 | 89.0 | 52.8 | 52.7 | 49.3 | 52.7 | 53.7 | 56.0 | 56.3 | 57.1 | 58.2 | 58.6 | 9  | NbGOX4   |
|            | 10 | 13.7             | 15.8 | 21.2 | 57.6 | 60.0 | 18.2 | 18.6 | 33.6 | 0.3  | █    | 91.7 | 88.8 | 52.8 | 52.7 | 49.3 | 52.7 | 53.7 | 56.0 | 56.3 | 57.1 | 58.2 | 58.6 | 10 | NbGOX5   |
|            | 11 | 10.6             | 12.3 | 15.4 | 52.8 | 55.1 | 15.7 | 16.1 | 30.1 | 8.5  | 8.8  | █    | 96.6 | 55.0 | 54.4 | 51.3 | 54.7 | 54.6 | 59.9 | 58.4 | 60.3 | 60.9 | 60.4 | 11 | NbGOX6   |
|            | 12 | 12.2             | 13.2 | 18.2 | 56.9 | 59.2 | 18.5 | 18.9 | 33.3 | 11.9 | 12.2 | 3.5  | █    | 53.4 | 52.8 | 48.8 | 53.1 | 53.0 | 58.2 | 57.3 | 58.9 | 59.2 | 58.4 | 12 | NbGOX7   |
|            | 13 | 68.1             | 68.1 | 72.1 | 44.4 | 43.4 | 70.0 | 70.7 | 80.3 | 72.8 | 72.8 | 67.4 | 71.3 | █    | 98.9 | 84.2 | 95.0 | 91.7 | 79.5 | 85.0 | 84.2 | 78.8 | 79.4 | 13 | NbHAOX1  |
|            | 14 | 67.8             | 67.8 | 73.1 | 44.1 | 43.1 | 70.8 | 71.4 | 81.1 | 72.8 | 72.8 | 68.8 | 72.7 | 1.1  | █    | 84.4 | 96.1 | 92.1 | 80.1 | 85.4 | 83.1 | 77.9 | 79.9 | 14 | NbHAOX2  |
|            | 15 | 76.3             | 75.4 | 80.8 | 55.7 | 54.4 | 76.7 | 77.6 | 93.1 | 81.8 | 81.8 | 76.5 | 83.1 | 17.7 | 17.6 | █    | 81.6 | 80.3 | 75.4 | 77.2 | 76.9 | 74.1 | 76.2 | 15 | NbHAOX3  |
|            | 16 | 67.1             | 67.1 | 72.4 | 42.7 | 42.2 | 69.4 | 70.1 | 79.4 | 72.8 | 72.8 | 68.1 | 72.1 | 5.2  | 4.0  | 21.1 | █    | 91.4 | 84.6 | 87.3 | 85.9 | 77.9 | 82.4 | 16 | NbHAOX4  |
|            | 17 | 65.2             | 64.5 | 71.4 | 42.4 | 44.1 | 67.5 | 68.3 | 78.0 | 70.6 | 70.6 | 68.3 | 72.2 | 8.8  | 8.4  | 23.0 | 9.2  | █    | 80.0 | 88.1 | 85.0 | 79.1 | 82.1 | 17 | NbHAOX5  |
|            | 18 | 57.2             | 57.6 | 61.8 | 38.8 | 39.3 | 58.3 | 59.0 | 68.4 | 65.1 | 65.1 | 56.9 | 60.3 | 24.0 | 23.2 | 29.9 | 17.2 | 23.3 | █    | 90.6 | 87.6 | 78.1 | 82.7 | 18 | NbHAOX6  |
|            | 19 | 57.8             | 56.7 | 61.3 | 37.0 | 37.4 | 59.9 | 60.5 | 67.8 | 64.4 | 64.4 | 60.0 | 62.2 | 16.8 | 16.3 | 27.2 | 13.9 | 13.0 | 10.1 | █    | 91.5 | 82.4 | 87.4 | 19 | NbHAOX7  |
|            | 20 | 56.3             | 56.3 | 59.2 | 36.2 | 38.9 | 56.7 | 57.2 | 67.4 | 62.8 | 62.8 | 56.0 | 58.9 | 17.8 | 19.1 | 27.7 | 15.6 | 16.7 | 13.6 | 9.1  | █    | 86.2 | 85.4 | 20 | NbHAOX8  |
|            | 21 | 56.9             | 58.0 | 58.6 | 33.2 | 35.3 | 57.2 | 57.8 | 68.8 | 60.3 | 60.3 | 54.8 | 58.3 | 24.9 | 26.2 | 31.7 | 26.2 | 24.6 | 25.9 | 20.2 | 15.3 | █    | 94.5 | 21 | NbHAOX9  |
|            | 22 | 56.7             | 57.8 | 59.5 | 33.5 | 35.6 | 57.6 | 58.2 | 67.1 | 59.4 | 59.4 | 55.7 | 59.8 | 24.1 | 23.5 | 28.7 | 20.2 | 20.5 | 19.7 | 13.9 | 16.3 | 5.7  | █    | 22 | NbHAOX10 |

**Supplementary Figure S2. Sequence similarity of GOX family proteins in *Nicotiana benthamiana* and *Arabidopsis thaliana*.** Sequence comparison was performed using MegAlign program of Lasergene software package.
